# Supplementary material for: Hydrothermal synthesis of conductive copper nanowires: effect of oleylamine and dextrose concentrations
Source: Royal Society of Chemistry journal article supplement (doi:10.1039/d5ra07427d), 2025-01-01
Supplement: d5ra07427d1.pdf [file d5ra07427d1.pdf]

### Supplementary Information

## Hydrothermal synthesis of conductive copper nanowires: Effect of oleylamine and dextrose concentrations

Gopu J, Shriya Musunuri and Krishna C. Etika  
Department of Chemical Engineering, BITS Pilani, Pilani, Rajasthan  
333031, India.

S1. EDX spectra of OA120D00 sample:

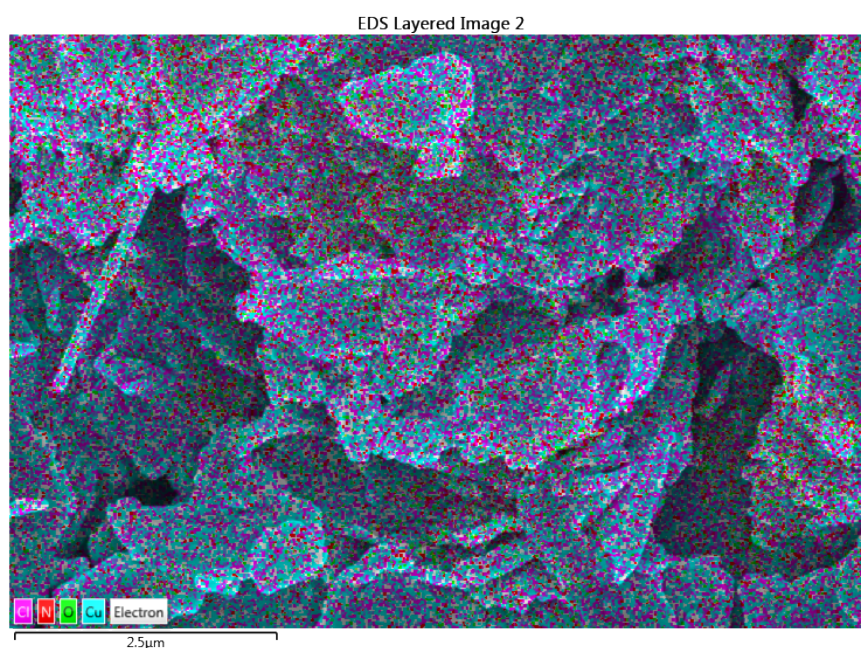

(a)

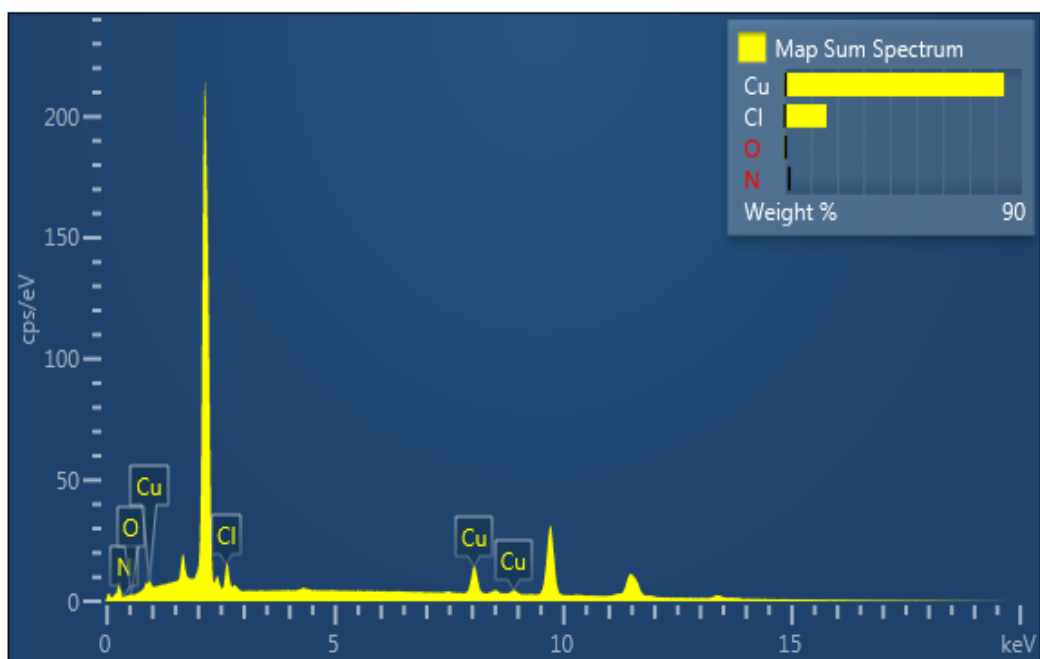

(b)

**Figure S1:** EDX Colour Mapping of Sample OA120D00 (a) Sum Spectra Map of the Selected Surface (b)

| Map Sum Spectrum | Wt%    | Wt% Sigma |
|------------------|--------|-----------|
| N                | 0.00   | 1.86      |
| O                | 0.79   | 0.49      |
| Cl               | 15.97  | 0.26      |
| Cu               | 83.23  | 0.48      |
| Total            | 100.00 |           |

**Table S1:** Weight Percentages of the Selected Area for Sample OA120D00
